# Supplementary material for: On chip steady liquid–gas phase separation for flexible generation of dissolved gas concentration gradient
Source: Royal Society of Chemistry journal article supplement (doi:10.1039/c2lc20985c), 2012-01-01
Supplement: c2lc20985c.pdf [file c2lc20985c.pdf]

## SUPPORTING INFORMATION

# On chip Steady liquid-gas phase separation for flexible generation of dissolved gas concentration gradient

Bi-Yi Xu, Shan-Wen Hu, Xiao-Na Yan, Xing-Hua Xia, Jing-Juan Xu\*, Hong-Yuan Chen

State Key Laboratory of Analytical Chemistry for Life Science, School of Chemistry and Chemical Engineering, Nanjing University, Nanjing 210093, China.

Email: [xuji@nju.edu.cn](mailto:xuji@nju.edu.cn)

**Table S1.** Summary for characteristics of typical gas dissolving interface for microfluidic chips

| No. | Liquid-gas interface type                            | Gas dissolving type and rate                                              | Gradient generation & stability                        | Application                                                | Ref.         |
|-----|------------------------------------------------------|---------------------------------------------------------------------------|--------------------------------------------------------|------------------------------------------------------------|--------------|
| 1   | Gas bubbling                                         | Air<br>Rate not mentioned                                                 | Generate convective flux, no stable gradient available | Room NH <sub>3</sub> monitoring                            | 6            |
| 2   | PDMS membrane (15 μ m thick)                         | Air<br>50~200 ml/min/m <sup>2</sup>                                       | Not mentioned                                          | Artificial lung                                            | 4            |
| 3   | PDMS membrane (50 μ m thick)                         | O <sub>2</sub><br>Rate not mentioned                                      | Not mentioned                                          | Photosensitized organic oxygenation reaction               | 7            |
| 4   | PDMS membrane (100 μ m thick)                        | O <sub>2</sub><br><20s for O <sub>2</sub> to perfuse through the membrane | Oxygen gradient generated                              | Cell culture under different O <sub>2</sub> concentrations | 2            |
| 5   | PDMS membrane (~200 μ m thick)                       | CO <sub>2</sub><br>Total acidification after 9.5 min                      | Not mentioned                                          |                                                            | 8            |
| 6   | 3D interconnected micro-porous PDMS (~200 μ m thick) | CO <sub>2</sub><br>Total acidification within 90s                         | Observable gradient                                    | Potential application for cell culture                     |              |
| 7   | SMA array bridge                                     | CO <sub>2</sub><br>Total acidification within 90s                         | Stable gradient with certain degree of flexibility     | CaCO <sub>3</sub> deposition reaction                      | Present work |

### Details for Physical modeling of DgCG

For DgCG modeling, Comsol multiphysics 3.5 is applied. The gradient system can be physically described by combining the steady state *incompressible Navier-Stocks equation*:

$$\rho((u \cdot \nabla)u) = -\nabla \cdot p + \eta(\nabla^2 u) \quad (1)$$

$$\nabla \cdot u = 0 \quad (2)$$

and the **convection and diffusion equation**:

$$D\nabla^2 c = u \cdot \nabla c \quad (3)$$

$\rho$ ,  $u$ ,  $P$  and  $\eta$  are the density, flow velocity field, pressure and the viscosity of the liquid.  $D$  and  $c$  are diffusion coefficient and dissolved gas concentration. The two equations are coupled together by sharing the 2D flow velocity field  $u$ . The detailed parameters and settings for the models share the following values.

**Table S2.** NS-equation boundary condition for **Model S1** and **Model S2**

| Boundary             | Condition | Value |
|----------------------|-----------|-------|
| Inlet                | Velocity  | $U_0$ |
| Outlet               | Pressure  | 0     |
| Gas-liquid interface | No slip   | -     |
| Wall                 | No slip   | -     |

**Table S3.** Convection and diffusion boundary condition for **Model S1** and **Model S2**

| Boundary             | Condition       | Value               |
|----------------------|-----------------|---------------------|
| Inlet                | Concentration   | $0 \text{ mol/m}^3$ |
| Outlet               | Convective flux | -                   |
| Gas-liquid interface | Concentration   | $1 \text{ mol/m}^3$ |
| Wall                 | Insulation      | -                   |

**Table S4.** Physical data for subdomain settings for **Model S1** and **Model S2**

| Physical quantity                                          | Value                                   |
|------------------------------------------------------------|-----------------------------------------|
| Diffusion coefficient for $\text{CO}_2$<br>(isotropic) $D$ | $1.77\text{e-}9\text{m}^2/\text{s}$     |
| Initial concentration for $\text{CO}_2$ $c_0$              | $0 \text{ mol/m}^3$                     |
| x-velocity                                                 | $u$ (the x direction component of $u$ ) |
| y-velocity                                                 | $v$ (the y direction component of $u$ ) |
| Liquid density $\rho$                                      | $1 \text{ kg/m}^3$                      |
| Liquid Dynamic viscosity $\eta$                            | $1 \text{ Pa}\cdot\text{s}$             |
| Liquid Volume force                                        | $0 \text{ N/ m}^3$                      |

**Table S5.** Geometrical settings for **Model S1**

| Geometrical parameters   | Value                                            |
|--------------------------|--------------------------------------------------|
| SMA single channel width | 10, 20, 30, 40, 50 $\mu\text{m}$                 |
| SMA interspaces          | 100, 150, 200, 300, 500 $\mu\text{m}$            |
| SMA inlet flow velocity  | 0.1, 0.2, 0.5, 1.0, 2.0 $\mu\text{L}/\text{min}$ |

The two dimensional simulations are performed in a triangular grid consisting of 23430 cells for model 1 and 54769 cells for model 2. The densities of the triangular grid are chosen to best adapt the geometry of the models for high quality results.

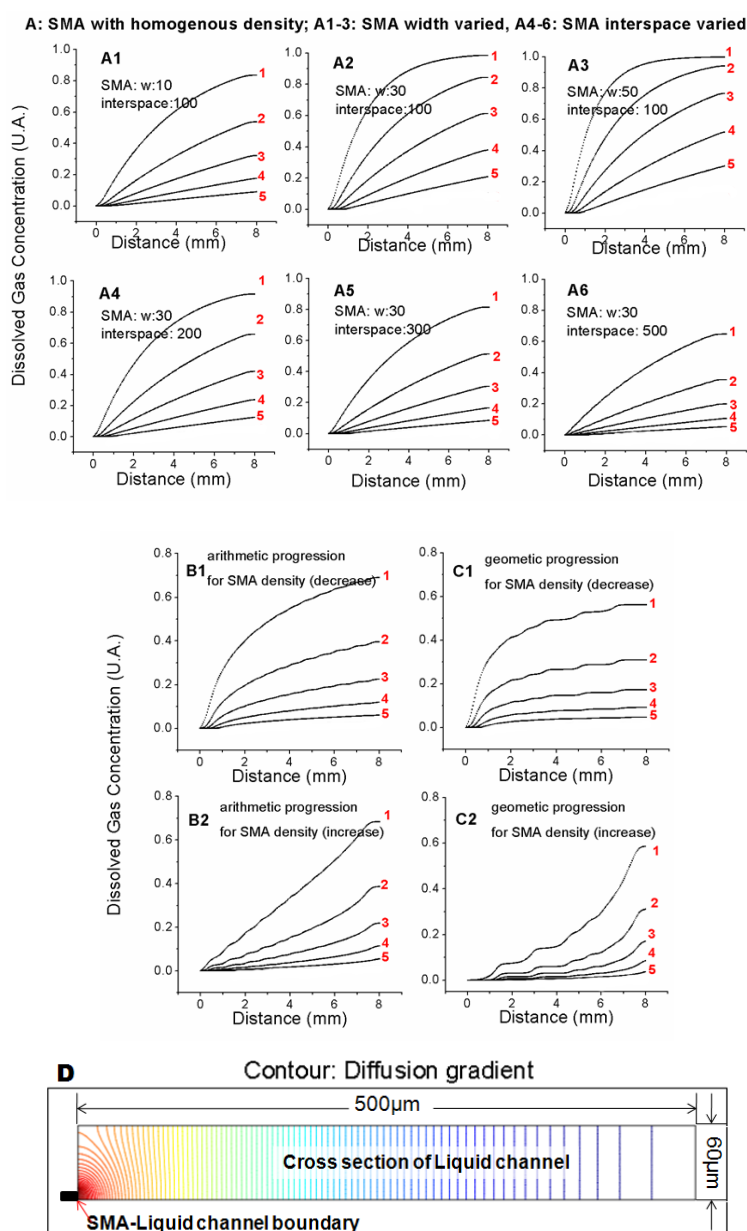

**Figure S1.** Modelled results for concentration profiles along the centreline of the liquid channel with different geometries and distribution of the SMA. 1 to 5 corresponds to inlet velocity from 0.1, 0.2, 0.4, 0.8 to 1.6  $\mu\text{L}/\text{min}$ . A1-6. Homogenous SMA distribution. A1-3. the small channels are equally interspaced of 100  $\mu\text{m}$ , but of different channel width (10, 30, 50  $\mu\text{m}$ ). A4-6. the small channels are of different interspaces (200, 300, 500  $\mu\text{m}$ ) but same channel width of 30  $\mu\text{m}$ . B1-2. Arithmetic progression for SMA distribution. C1-2. Geometric

progression for SMA distribution. D. distribution of the diffusion gradient

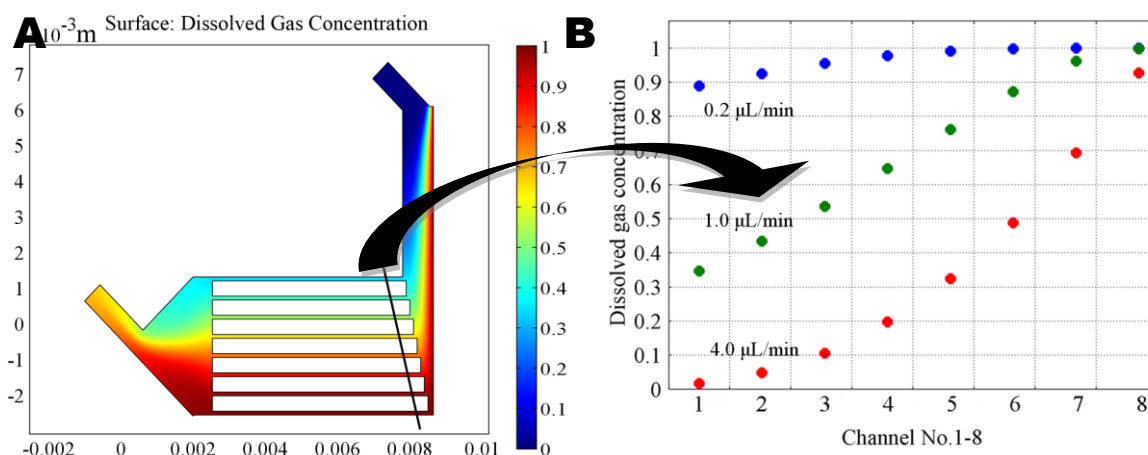

**Figure S2.** The  $\text{CO}_2$  concentration distribution in model S2. A. the  $\text{CO}_2$  concentration distribution under inlet flow velocity of 1.0  $\mu\text{L}/\text{min}$ , B. the dissolved  $\text{CO}_2$  concentration in the 8 channels under inlet flow velocity of 0.2, 1.0, 4.0  $\mu\text{L}/\text{min}$ . The local concentration is normalized based on the scale that the saturation concentration is 1.

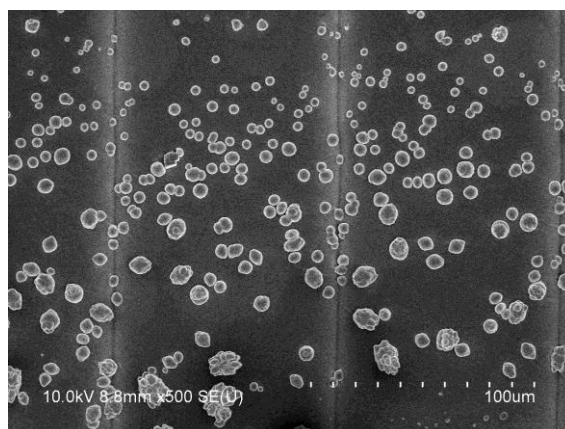

**Figure S3.** Birds view for the generated  $\text{CaCO}_3$  in the channel near the liquid-gas interface in the major channel (region of dotted red frame in figure 4B). The top of the image is near the liquid-gas interface.

### Transforming the color information to $\text{CO}_2$ content

To transform the color information to the related content of the dissolved carbon dioxide, we did the following experiment.

First, the colors of solutions under different pH are recorded in standard condition.

Second, to link the pH to the carbon dioxide concentration, calculations are carried out to estimate the amount of carbon dioxide needed to transform the bromthel blue solution (containing 10 mM NaOH) to a certain pH. The calculations are based on the principle for acid-base equilibrium.

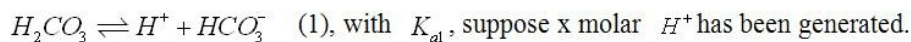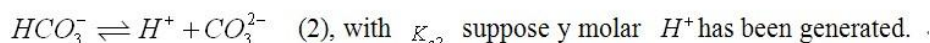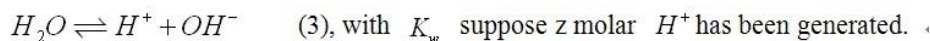

|             | $H_2CO_3$ | $HCO_3^-$ | $CO_3^{2-}$ | $OH^-$ | $H^+$ |
|-------------|-----------|-----------|-------------|--------|-------|
| Start       | a         | b         | c           | d      | 0     |
| Equilibrium | a-x       | b+x-y     | c+y         | d+z    | x+y+z |

Based on the above relationship, it can be deduced:

$$\left. \begin{aligned} K_{a1} &= \frac{(b+x-y)*(x+y+z)}{(a-x)} \\ K_{a2} &= \frac{(c+y)*(x+y+z)}{(b+x-y)} \\ K_w &= (d+z)*(x+y+z) \end{aligned} \right\} \Rightarrow \left\{ \begin{aligned} K_{a1} &= \frac{(b+x-y)*K_w}{(a-x)*(d+z)} \quad (4) \\ K_{a2} &= \frac{(c+y)*K_w}{(b+x-y)*(d+z)} \quad (5) \\ K_w &= (d+z)*(x+y+z) \quad (6) \end{aligned} \right.$$

Where  $K_{a1}=4.3*10^{-7}$ ,  $K_{a2}=5.6*10^{-11}$ ,  $K_w=10^{-14}$

The equations are solved for the content of  $H^+$ , using following values corresponding to a, b, c and d as is shown in the following table. The content of  $H^+$  is then transformed to pH. To solve the equations, the software Mathematica 5 is applied. Curve fittings are applied for the relationship between the  $CO_2\% \sim pH$  with the help of Matlab 7.0 curve fitting tools. The original solution is  $pH=12$ , and the  $CO_2$  saturated solution is  $pH=6.1$ .

**Table S6.** Relationship between pH and the content of carbon dioxide.

| NaOH<br>(d) | $Na_2CO_3$<br>(c) | $NaHCO_3$<br>(b) | $H_2CO_3$<br>(a) | $CO_2$<br>content<br>(Mol) | pH<br>(calculated) | $CO_2$<br>content<br>% |
|-------------|-------------------|------------------|------------------|----------------------------|--------------------|------------------------|
| 0.01        |                   |                  |                  | 0                          | 12.0000            | 0                      |
| 0.008       | 0.001             |                  |                  | 0.001                      | 11.9043            | 3.624633               |
| 0.006       | 0.002             |                  |                  | 0.002                      | 11.7823            | 7.249266               |
| 0.004       | 0.003             |                  |                  | 0.003                      | 11.6154            | 10.8739                |
| 0.002       | 0.004             |                  |                  | 0.004                      | 11.3597            | 14.49853               |
| 0           | 0.005             | 0                |                  | 0.005                      | 10.9344            | 18.12317               |
|             | 0.004             | 0.002            |                  | 0.006                      | 10.4616            | 21.7478                |
|             | 0.003             | 0.004            |                  | 0.007                      | 10.0954            | 25.37243               |
|             | 0.002             | 0.006            |                  | 0.008                      | 9.75881            | 28.99706               |
|             | 0.001             | 0.008            |                  | 0.009                      | 9.34252            | 32.6217                |
|             | 0.0005            | 0.009            |                  | 0.0095                     | 9.00695            | 34.43401               |
|             | 0.0002            | 0.0096           |                  | 0.0098                     | 8.66063            | 35.5214                |
|             | 0                 | 0.01             | 0                | 0.01                       | 8.30525            | 36.24633               |

|      |        |        |         |          |
|------|--------|--------|---------|----------|
| 0.01 | 0.0001 | 0.0101 | 8.11961 | 36.60879 |
| 0.01 | 0.0002 | 0.0102 | 7.96134 | 36.97126 |
| 0.01 | 0.0005 | 0.0105 | 7.64423 | 38.05865 |
| 0.01 | 0.001  | 0.011  | 7.35981 | 39.87096 |
| 0.01 | 0.002  | 0.012  | 7.06353 | 43.4956  |
| 0.01 | 0.005  | 0.015  | 6.66713 | 54.3695  |
| 0.01 | 0.01   | 0.02   | 6.36640 | 72.49266 |
| 0.01 | 0.015  | 0.025  | 6.19030 | 90.61583 |
| 0.01 | 0.02   | 0.03   | 6.06549 | >100     |

Last, the location with the same color as the recorded with known pH are transformed to the content of CO<sub>2</sub> as are imaged in [Fig. 4 A3](#) in the text.
